# Supplementary material for: Novel Insight Into The Potential Role of AGPAT Gene Family in Triacylglycerols Synthesis in Buffalo
Source: Research Square preprint supplement (doi:10.21203/rs.3.rs-382481/v1), 2021-04-06
Supplement: Supplementary file 1 [file c051111ec9eb0e1fbcf94883.xlsx]

## Sheet: Sheet1
Table S6. Analysis of Ka/Ks ratios for orthologous AGPAT gene pairs between buffalo and cattle
Seq1（buffalo）	Seq2（cattle）	Ka	Ks	Ka/Ks Ratio	Date(Mya)
AGPAT3	AGPAT3	0.00237342	0.0334628	0.0709271	1.32789
GPAT4	GPAT4	0.000962618	0.0613575	0.0156887	2.43482
AGPAT5	AGPAT5	0.00361955	0.0117114	0.309063	0.464737
AGPAT1	AGPAT1	0	0.0133932	0	0.531477
LPGAT1	LPGAT1	0	0.0327474	0	1.2995
GPAT3	GPAT3	0.00706422	0.0327116	0.215954	1.29808
AGPAT4	AGPAT4	0.00633862	0.0674812	0.0939318	2.67782
LPCAT4	LPCAT4	0.00521288	0.0555342	0.0938679	2.20374
LCLAT1	LCLAT1	0.00576372	0.0367171	0.156977	1.45703
AGPAT2	AGPAT2	0.00646208	0.0347169	0.186136	1.37766
LPCAT2	LPCAT2	0.00407361	0.025737	0.158278	1.02131
LPCAT1	LPCAT1	0.0093678	0.0740239	0.126551	2.93746
